# Supplementary material
Source: publisher figshare collection journal article supplement (https://frontiersin.figshare.com/ndownloader/files/17907485)
Supplement: Supplementary file 1 [file 17907485]

## Sheet: AAdecisive
Supplementary Table S4: Groups defined for the Four-cluster Likelihood Mapping (FcLM) analyses.
node in tree	group 1 (nos. of species)	group 2 (nos. of species)	group 3 (nos. of species)	group 4 (nos. of species)	# partitions	# sites	# unique quartets
1	Lanceocercata (5)	"Xeroderinae" part. (1)	Clitumninae (3)	Cladomorphinae (2)	205	387987	30
2	Medauroidea, Ramulus (2)	Tirachoidea (1)	Lanceocercata, "Xeroderinae" part. (6)	Cladomorphinae (2)	205	387987	30
3	Lanceocercata, "Xeroderinae" part. (6)	Clitumninae (3)	Cladomorphinae (2)	Lonchodinae, Necrosciinae (5)	205	387987	24
4	Lanceocercata, "Xeroderinae" part., Clitumninae (9)	Cladomorphinae (2)	Bacillus rossius, Phyllium philippinicum, Malagasy clade (6)	Lonchodinae, Necrosciinae(5)	205	387987	540
5	Lonchodinae (2)	Necrosciinae (3)	Lanceocercata, "Xeroderinae" part., Clitumninae, Cladomorphinae (11)	Bacillus rossius, Phyllium philippinicum, Malagasy clade (6)	205	387987	396
6	Lonchodinae, Necrosciinae (5)	Lanceocercata, "Xeroderinae" part., Clituminae, Tirachoidea, Cladomorphinae (11)	Heteropteryginae (5)	Bacillus rossius, Phyllium philippinicum, Malagasy clade (6)	205	387987	1650
7	Achrioptera fallax, Paranisacantha sp (2)	Antongilia madagassa, Spathomorpha lancettifer (2)	Bacillus rossius, Phyllium philippinicum (2)	Lanceocercata, "Xeroderinae" part., Clituminae, Tirachoidea, Cladomorphinae, Lonchodinae, Necrosciinae (16)	203	386915	128
8	Bacillus rossius (1)	Phyllium philippinicum (1)	Malagasy clade (4)	Lanceocercata, "Xeroderinae" part., Clituminae, Tirachoidea, Cladomorphinae, Lonchodinae, Necrosciinae (16)	205	387987	64
9	Malagasy clade (4)	Bacillus rossius, Phyllium philippinicum (2)	Lanceocercata, "Xeroderinae" part., Clituminae, Tirachoidea, Cladomorphinae, Lonchodinae, Necrosciinae (16)	Heteropteryginae (5)	205	387987	640
10	Lanceocercata, "Xeroderinae" part., Clituminae, Tirachoidea, Cladomorphinae, Lonchodinae, Necrosciinae (16)	Bacillus rossius, Phyllium philippinicum, Malagasy clade (6)	Heteropteryginae (5)	Occidophasmata (8)	205	387987	3840
11	Heteropterygini (1)	Dataminae (2)	Obriminae (2)	remain. Oriophasmata (22)	203	387274	88
12	Heteropterygini, Dataminae (3)	Obriminae (2)	remain. Oriophasmata (22)	Occidophasmata (8)	205	387987	1056
13	remain. Oriophasmata (22)	Heteropteryginae (5)	Occidophasmata (8)	Aschiphasmatinae (2)	205	387987	1760
14	Pseudophasmatinae (4)	Agathemera crassa (1)	Diapheromerinae (3)	Oriophasmata (27)	205	387987	324
15	Diapheromerinae (3)	Pseudophasmatinae, Agathemera crassa (5)	Oriophasmata (27)	Aschiphasmatinae (2)	205	387987	810
16	Occidophasmata (8)	Oriophasmata (27)	Aschiphasmatinae (2)	Timema (1)	205	387987	432
17	Neophasmatodea (35)	Aschiphasmatinae (2)	Timema (1)	Embioptera (5)	205	387987	350

## Sheet: Node1
clade	taxa	group
Lanceocercata	Dimorphodes sp	group1
Lanceocercata	Extatosoma tiaratum	group1
Lanceocercata	Megacrania phelaus	group1
Lanceocercata	Clitarchus hookeri	group1
Lanceocercata	Spinotectarchus acornutus	group1
"Xeroderinae" part.	Xenophasmina simile	group2
Clitumninae	Medauroidea extradentata	group3
Clitumninae	Ramulus artemis	group3
Clitumninae	Tirachoidea westwoodii	group3
Cladomorphinae	Agamemnon cornutus	group4
Cladomorphinae	Diapherodes gigantea	group4

## Sheet: Node2
clade	taxa	group
Medauroidea+Ramulus	Medauroidea extradentata	group1
Medauroidea+Ramulus	Ramulus artemis	group1
Tirachoidea	Tirachoidea westwoodii	group2
Lanceocercata, "Xeroderinae" part.	Dimorphodes sp	group3
Lanceocercata, "Xeroderinae" part.	Extatosoma tiaratum	group3
Lanceocercata, "Xeroderinae" part.	Megacrania phelaus	group3
Lanceocercata, "Xeroderinae" part.	Clitarchus hookeri	group3
Lanceocercata, "Xeroderinae" part.	Spinotectarchus acornutus	group3
Lanceocercata, "Xeroderinae" part.	Xenophasmina simile	group3
Cladomorphinae	Agamemnon cornutus	group4
Cladomorphinae	Diapherodes gigantea	group4

## Sheet: Node3
clade	taxa	group
Lanceocercata, "Xeroderinae" part.	Dimorphodes sp	group1
Lanceocercata, "Xeroderinae" part.	Extatosoma tiaratum	group1
Lanceocercata, "Xeroderinae" part.	Megacrania phelaus	group1
Lanceocercata, "Xeroderinae" part.	Clitarchus hookeri	group1
Lanceocercata, "Xeroderinae" part.	Spinotectarchus acornutus	group1
Lanceocercata, "Xeroderinae" part.	Xenophasmina simile	group1
Clitumninae	Medauroidea extradentata	group2
Clitumninae	Ramulus artemis	group2
Clitumninae	Tirachoidea westwoodii	group2
Cladomorphinae	Agamemnon cornutus	group3
Cladomorphinae	Diapherodes gigantea	group3
Lonchodinae, Necrosciinae	Carausius morosus	group4
Lonchodinae, Necrosciinae	Eurycantha calcarata	group4
Lonchodinae, Necrosciinae	Sipyloidea biplagiata	group4
Lonchodinae, Necrosciinae	Orxines xiphias	group4
Lonchodinae, Necrosciinae	Neohirasea fruhstorferi	group4

## Sheet: Node4
clade	taxa	group
Lanceocercata, "Xeroderinae" part.,Clitumninae	Dimorphodes sp	group1
Lanceocercata, "Xeroderinae" part.,Clitumninae	Extatosoma tiaratum	group1
Lanceocercata, "Xeroderinae" part.,Clitumninae	Megacrania phelaus	group1
Lanceocercata, "Xeroderinae" part.,Clitumninae	Clitarchus hookeri	group1
Lanceocercata, "Xeroderinae" part.,Clitumninae	Spinotectarchus acornutus	group1
Lanceocercata, "Xeroderinae" part.,Clitumninae	Xenophasmina simile	group1
Lanceocercata, "Xeroderinae" part.,Clitumninae	Medauroidea extradentata	group1
Lanceocercata, "Xeroderinae" part.,Clitumninae	Ramulus artemis	group1
Lanceocercata, "Xeroderinae" part.,Clitumninae	Tirachoidea westwoodii	group1
Cladomorphinae	Agamemnon cornutus	group2
Cladomorphinae	Diapherodes gigantea	group2
Bacillus rossius, Phyllium philippinicum, Malagasy clade	Bacillus rossius	group3
Bacillus rossius, Phyllium philippinicum, Malagasy clade	Phyllium philippinicum	group3
Bacillus rossius, Phyllium philippinicum, Malagasy clade	Achrioptera fallax	group3
Bacillus rossius, Phyllium philippinicum, Malagasy clade	Paranisacantha sp	group3
Bacillus rossius, Phyllium philippinicum, Malagasy clade	Antongilia madagassa	group3
Bacillus rossius, Phyllium philippinicum, Malagasy clade	Spathomorpha lancettifer	group3
Lonchodinae, Necrosciinae	Carausius morosus	group4
Lonchodinae, Necrosciinae	Eurycantha calcarata	group4
Lonchodinae, Necrosciinae	Sipyloidea biplagiata	group4
Lonchodinae, Necrosciinae	Orxines xiphias	group4
Lonchodinae, Necrosciinae	Neohirasea fruhstorferi	group4

## Sheet: Node5
clade	taxa	group
Lonchodinae	Carausius morosus	group1
Lonchodinae	Eurycantha calcarata	group1
Necrosciinae	Sipyloidea biplagiata	group2
Necrosciinae	Orxines xiphias	group2
Necrosciinae	Neohirasea fruhstorferi	group2
Lanceocercata, "Xeroderinae" part., Clitumninae, Cladomorphinae	Dimorphodes sp	group3
Lanceocercata, "Xeroderinae" part., Clitumninae, Cladomorphinae	Extatosoma tiaratum	group3
Lanceocercata, "Xeroderinae" part., Clitumninae, Cladomorphinae	Megacrania phelaus	group3
Lanceocercata, "Xeroderinae" part., Clitumninae, Cladomorphinae	Clitarchus hookeri	group3
Lanceocercata, "Xeroderinae" part., Clitumninae, Cladomorphinae	Spinotectarchus acornutus	group3
Lanceocercata, "Xeroderinae" part., Clitumninae, Cladomorphinae	Xenophasmina simile	group3
Lanceocercata, "Xeroderinae" part., Clitumninae, Cladomorphinae	Medauroidea extradentata	group3
Lanceocercata, "Xeroderinae" part., Clitumninae, Cladomorphinae	Ramulus artemis	group3
Lanceocercata, "Xeroderinae" part., Clitumninae, Cladomorphinae	Tirachoidea westwoodii	group3
Lanceocercata, "Xeroderinae" part., Clitumninae, Cladomorphinae	Agamemnon cornutus	group3
Lanceocercata, "Xeroderinae" part., Clitumninae, Cladomorphinae	Diapherodes gigantea	group3
Bacillus rossius, Phyllium philippinicum, Malagasy clade	Bacillus rossius	group4
Bacillus rossius, Phyllium philippinicum, Malagasy clade	Phyllium philippinicum	group4
Bacillus rossius, Phyllium philippinicum, Malagasy clade	Achrioptera fallax	group4
Bacillus rossius, Phyllium philippinicum, Malagasy clade	Paranisacantha sp	group4
Bacillus rossius, Phyllium philippinicum, Malagasy clade	Antongilia madagassa	group4
Bacillus rossius, Phyllium philippinicum, Malagasy clade	Spathomorpha lancettifer	group4

## Sheet: Node6
clade	taxa	group
Lonchodinae, Necrosciinae	Carausius morosus	group1
Lonchodinae, Necrosciinae	Eurycantha calcarata	group1
Lonchodinae, Necrosciinae	Sipyloidea biplagiata	group1
Lonchodinae, Necrosciinae	Orxines xiphias	group1
Lonchodinae, Necrosciinae	Neohirasea fruhstorferi	group1
Lanceocercata, "Xeroderinae" part., Clitumninae, Cladomorphinae	Dimorphodes sp	group2
Lanceocercata, "Xeroderinae" part., Clitumninae, Cladomorphinae	Extatosoma tiaratum	group2
Lanceocercata, "Xeroderinae" part., Clitumninae, Cladomorphinae	Megacrania phelaus	group2
Lanceocercata, "Xeroderinae" part., Clitumninae, Cladomorphinae	Clitarchus hookeri	group2
Lanceocercata, "Xeroderinae" part., Clitumninae, Cladomorphinae	Spinotectarchus acornutus	group2
Lanceocercata, "Xeroderinae" part., Clitumninae, Cladomorphinae	Xenophasmina simile	group2
Lanceocercata, "Xeroderinae" part., Clitumninae, Cladomorphinae	Medauroidea extradentata	group2
Lanceocercata, "Xeroderinae" part., Clitumninae, Cladomorphinae	Ramulus artemis	group2
Lanceocercata, "Xeroderinae" part., Clitumninae, Cladomorphinae	Tirachoidea westwoodii	group2
Lanceocercata, "Xeroderinae" part., Clitumninae, Cladomorphinae	Agamemnon cornutus	group2
Lanceocercata, "Xeroderinae" part., Clitumninae, Cladomorphinae	Diapherodes gigantea	group2
Heteropteryginae	Heteropteryx dilatata	group3
Heteropteryginae	Trachyaretaon brueckneri	group3
Heteropteryginae	Epidares nolimetangere	group3
Heteropteryginae	Aretaon asperrimus	group3
Heteropteryginae	Orestes mouhotii	group3
Bacillus rossius, Phyllium philippinicum, Malagasy clade	Bacillus rossius	group4
Bacillus rossius, Phyllium philippinicum, Malagasy clade	Phyllium philippinicum	group4
Bacillus rossius, Phyllium philippinicum, Malagasy clade	Achrioptera fallax	group4
Bacillus rossius, Phyllium philippinicum, Malagasy clade	Paranisacantha sp	group4
Bacillus rossius, Phyllium philippinicum, Malagasy clade	Antongilia madagassa	group4
Bacillus rossius, Phyllium philippinicum, Malagasy clade	Spathomorpha lancettifer	group4

## Sheet: Node7
clade	taxa	group
Malagasy clade	Achrioptera fallax	group1
Malagasy clade	Paranisacantha sp	group1
Malagasy clade	Antongilia madagassa	group2
Malagasy clade	Spathomorpha lancettifer	group2
Bacillus rossius, Phyllium philippinicum	Phyllium philippinicum	group3
Bacillus rossius, Phyllium philippinicum	Bacillus rossius	group3
Lanceocercata, "Xeroderinae" part., Clitumninae, Cladomorphinae, Lonchodinae, Necrosciinae	Tirachoidea westwoodii	group4
Lanceocercata, "Xeroderinae" part., Clitumninae, Cladomorphinae, Lonchodinae, Necrosciinae	Medauroidea extradentata	group4
Lanceocercata, "Xeroderinae" part., Clitumninae, Cladomorphinae, Lonchodinae, Necrosciinae	Ramulus artemis	group4
Lanceocercata, "Xeroderinae" part., Clitumninae, Cladomorphinae, Lonchodinae, Necrosciinae	Dimorphodes sp	group4
Lanceocercata, "Xeroderinae" part., Clitumninae, Cladomorphinae, Lonchodinae, Necrosciinae	Extatosoma tiaratum	group4
Lanceocercata, "Xeroderinae" part., Clitumninae, Cladomorphinae, Lonchodinae, Necrosciinae	Megacrania phelaus	group4
Lanceocercata, "Xeroderinae" part., Clitumninae, Cladomorphinae, Lonchodinae, Necrosciinae	Clitarchus hookeri	group4
Lanceocercata, "Xeroderinae" part., Clitumninae, Cladomorphinae, Lonchodinae, Necrosciinae	Spinotectarchus acornutus	group4
Lanceocercata, "Xeroderinae" part., Clitumninae, Cladomorphinae, Lonchodinae, Necrosciinae	Xenophasmina simile	group4
Lanceocercata, "Xeroderinae" part., Clitumninae, Cladomorphinae, Lonchodinae, Necrosciinae	Agamemnon cornutus	group4
Lanceocercata, "Xeroderinae" part., Clitumninae, Cladomorphinae, Lonchodinae, Necrosciinae	Diapherodes gigantea	group4
Lanceocercata, "Xeroderinae" part., Clitumninae, Cladomorphinae, Lonchodinae, Necrosciinae	Carausius morosus	group4
Lanceocercata, "Xeroderinae" part., Clitumninae, Cladomorphinae, Lonchodinae, Necrosciinae	Eurycantha calcarata	group4
Lanceocercata, "Xeroderinae" part., Clitumninae, Cladomorphinae, Lonchodinae, Necrosciinae	Sipyloidea biplagiata	group4
Lanceocercata, "Xeroderinae" part., Clitumninae, Cladomorphinae, Lonchodinae, Necrosciinae	Orxines xiphias	group4
Lanceocercata, "Xeroderinae" part., Clitumninae, Cladomorphinae, Lonchodinae, Necrosciinae	Neohirasea fruhstorferi	group4

## Sheet: Node8
clade	taxa	group
Bacillus rossius	Bacillus rossius	group1
Phyllium philippinicum	Phyllium philippinicum	group2
Malagasy clade	Achrioptera fallax	group3
Malagasy clade	Paranisacantha sp	group3
Malagasy clade	Antongilia madagassa	group3
Malagasy clade	Spathomorpha lancettifer	group3
Lanceocercata, "Xeroderinae" part., Clitumninae, Cladomorphinae, Lonchodinae, Necrosciinae	Tirachoidea westwoodii	group4
Lanceocercata, "Xeroderinae" part., Clitumninae, Cladomorphinae, Lonchodinae, Necrosciinae	Medauroidea extradentata	group4
Lanceocercata, "Xeroderinae" part., Clitumninae, Cladomorphinae, Lonchodinae, Necrosciinae	Ramulus artemis	group4
Lanceocercata, "Xeroderinae" part., Clitumninae, Cladomorphinae, Lonchodinae, Necrosciinae	Dimorphodes sp	group4
Lanceocercata, "Xeroderinae" part., Clitumninae, Cladomorphinae, Lonchodinae, Necrosciinae	Extatosoma tiaratum	group4
Lanceocercata, "Xeroderinae" part., Clitumninae, Cladomorphinae, Lonchodinae, Necrosciinae	Megacrania phelaus	group4
Lanceocercata, "Xeroderinae" part., Clitumninae, Cladomorphinae, Lonchodinae, Necrosciinae	Clitarchus hookeri	group4
Lanceocercata, "Xeroderinae" part., Clitumninae, Cladomorphinae, Lonchodinae, Necrosciinae	Spinotectarchus acornutus	group4
Lanceocercata, "Xeroderinae" part., Clitumninae, Cladomorphinae, Lonchodinae, Necrosciinae	Xenophasmina simile	group4
Lanceocercata, "Xeroderinae" part., Clitumninae, Cladomorphinae, Lonchodinae, Necrosciinae	Agamemnon cornutus	group4
Lanceocercata, "Xeroderinae" part., Clitumninae, Cladomorphinae, Lonchodinae, Necrosciinae	Diapherodes gigantea	group4
Lanceocercata, "Xeroderinae" part., Clitumninae, Cladomorphinae, Lonchodinae, Necrosciinae	Carausius morosus	group4
Lanceocercata, "Xeroderinae" part., Clitumninae, Cladomorphinae, Lonchodinae, Necrosciinae	Eurycantha calcarata	group4
Lanceocercata, "Xeroderinae" part., Clitumninae, Cladomorphinae, Lonchodinae, Necrosciinae	Sipyloidea biplagiata	group4
Lanceocercata, "Xeroderinae" part., Clitumninae, Cladomorphinae, Lonchodinae, Necrosciinae	Orxines xiphias	group4
Lanceocercata, "Xeroderinae" part., Clitumninae, Cladomorphinae, Lonchodinae, Necrosciinae	Neohirasea fruhstorferi	group4

## Sheet: Node9
clade	taxa	group
Malagasy clade	Achrioptera fallax	group1
Malagasy clade	Paranisacantha sp	group1
Malagasy clade	Antongilia madagassa	group1
Malagasy clade	Spathomorpha lancettifer	group1
Bacillus rossius, Phyllium philippinicum	Bacillus rossius	group2
Bacillus rossius, Phyllium philippinicum	Phyllium philippinicum	group2
Lanceocercata, "Xeroderinae" part., Clitumninae, Cladomorphinae, Lonchodinae, Necrosciinae	Tirachoidea westwoodii	group3
Lanceocercata, "Xeroderinae" part., Clitumninae, Cladomorphinae, Lonchodinae, Necrosciinae	Medauroidea extradentata	group3
Lanceocercata, "Xeroderinae" part., Clitumninae, Cladomorphinae, Lonchodinae, Necrosciinae	Ramulus artemis	group3
Lanceocercata, "Xeroderinae" part., Clitumninae, Cladomorphinae, Lonchodinae, Necrosciinae	Dimorphodes sp	group3
Lanceocercata, "Xeroderinae" part., Clitumninae, Cladomorphinae, Lonchodinae, Necrosciinae	Extatosoma tiaratum	group3
Lanceocercata, "Xeroderinae" part., Clitumninae, Cladomorphinae, Lonchodinae, Necrosciinae	Megacrania phelaus	group3
Lanceocercata, "Xeroderinae" part., Clitumninae, Cladomorphinae, Lonchodinae, Necrosciinae	Clitarchus hookeri	group3
Lanceocercata, "Xeroderinae" part., Clitumninae, Cladomorphinae, Lonchodinae, Necrosciinae	Spinotectarchus acornutus	group3
Lanceocercata, "Xeroderinae" part., Clitumninae, Cladomorphinae, Lonchodinae, Necrosciinae	Xenophasmina simile	group3
Lanceocercata, "Xeroderinae" part., Clitumninae, Cladomorphinae, Lonchodinae, Necrosciinae	Agamemnon cornutus	group3
Lanceocercata, "Xeroderinae" part., Clitumninae, Cladomorphinae, Lonchodinae, Necrosciinae	Diapherodes gigantea	group3
Lanceocercata, "Xeroderinae" part., Clitumninae, Cladomorphinae, Lonchodinae, Necrosciinae	Carausius morosus	group3
Lanceocercata, "Xeroderinae" part., Clitumninae, Cladomorphinae, Lonchodinae, Necrosciinae	Eurycantha calcarata	group3
Lanceocercata, "Xeroderinae" part., Clitumninae, Cladomorphinae, Lonchodinae, Necrosciinae	Sipyloidea biplagiata	group3
Lanceocercata, "Xeroderinae" part., Clitumninae, Cladomorphinae, Lonchodinae, Necrosciinae	Orxines xiphias	group3
Lanceocercata, "Xeroderinae" part., Clitumninae, Cladomorphinae, Lonchodinae, Necrosciinae	Neohirasea fruhstorferi	group3
Heteropteryginae	Heteropteryx dilatata	group4
Heteropteryginae	Trachyaretaon brueckneri	group4
Heteropteryginae	Epidares nolimetangere	group4
Heteropteryginae	Aretaon asperrimus	group4
Heteropteryginae	Orestes mouhotii	group4

[truncated: 8 more sheets: Node10, Node11, Node12, Node13, Node14, Node15, Node16, Node17]
